# Supplementary material for: Global fingerprint of humans on the distribution of Bartonella bacteria in mammals
Source: PLoS Negl Trop Dis. 2018 Nov 15;12(11):e0006865. doi: 10.1371/journal.pntd.0006865 (PMC6237287; doi:10.1371/journal.pntd.0006865)
Supplement: S5 File — This file lists every well-supported host switching event captured in our 540bp phylogenetic hypothesis. A legend for interpreting each column appears on the second sheet of the file. (XLSX) [file pntd.0006865.s011.xlsx]

## Sheet: Data
Order	Representative sequence	Rodent	Human	bat	shrew	other	other	Support	Node age	Min height	95% HPD low	95% HPD high
1	GU143513	1			1			1	0.89889	0.0669054	0.0909639	1.96446
2	GU143515	1			1			0.96	0.35832	1.0031e-05	1.0031e-05	0.943555
3	Z70009	1	1					1	0.436154	0.00278365	0.00278365	1.07651	rattus
4	NJPP01000008.1	1			1			0.93	11.3468	1.92741	2.3252	23.5377
5	Z70022	1		1				1	25.3283	4.53244	6.43241	50.3133
6	FJ376732		1	1				0.76	6.21393	0.663312	0.834139	14.217	this ignores the fact that there's probably a closer relative in the North American bat (mayotimonensis)
7	EU979534	1		1				1	8.6691	0.932841	1.46711	19.1859
8	AF143445		1			dog		1	0.609732	0.0087788	0.0261514	1.34174	this is a bit longer of a divergence than actual since I went to one higher of a node
9	Z70015	1				dog		0.98	6.25341	0.689344	1.03057	13.7192
10	EF031547	1			1			1	13.5734	2.06336	3.1317	28.6626
11	HM622142	1			1			1	4.70208	0.474883	0.628882	10.2336
12	KX655824	1		1				0.73	38.9763	6.35841	7.99034	80.3394
13	AJ439406		1			cat		1	0.68706	0.0449033	0.0680071	1.43232	maybe only do one henselae b/c it swamps the signal otherwise?
14	CP003784		1			primate		1	2.39042	0.223125	0.277038	5.70593
15	KL407337		1			dog/ wild canid		0.97	2.64726	0.100941	0.125179	2.7087	rochalimae
17	KY913637	1				carnivores (including a cat ectoparasite and dogs)		1	6.59348	0.761231	1.10246	11.069
18	GU143541	1			1			1	10.0538	1.40749	1.94774	18.3244
20	CP019788					domestic cat	badger	0.87	13.0608	1.24317	1.96519	26.416
21	clarridgeiae	1				cat		1	19.6923	2.82666	3.64874	38.1213
22	HG977196		1			artiodactyl		1	2.61441	0.0719699	0.130241	2.64603
23	NC008783	1	1					1	1.87629	0.000692199	0.00136974	1.12439
15A	HE997540	1				cat		0.98	11.2329	1.30117	1.99267	24.387
16A	KP100341	1		1				0.84	17.1156	1.98045	3.51407	37.1339
17A	CP003784		1	1				1	23.5487	3.08756	4.44019	50.0281

## Sheet: Legend
Heading	Explanation
Order	Event number on the phylogeny in S1 figure indicating a monophyletic clade in which the host order has transferred, roughly in order from top to bottom of the phylogeny in S1 figure
Representative sequence	The accession number for a representative sequence in the monophyletic clade which contains a host transfer
Rodent	Indicates the clade includes DNA isolated from a rodent or its ectoparasite
Human	Indicates the clade includes DNA isolated from a human or its ectoparasite
bat	Indicates the clade includes DNA isolated from a bat or its ectoparasite
shrew	Indicates the clade includes DNA isolated from a shrew or its ectoparasite
other	Indicates the clade includes DNA isolated from a different animal or its ectoparasite and which animal is specified in the text
other	Indicates the clade includes DNA isolated from a different animal or its ectoparasite and which animal is specified in the text
Support	The value of the inferred Bayesian posterior probability support for the monophyletic clade
Node age	The estimated age of the node in millions of years
Min height	The lowest estimate of the range of possible node heights (which is roughly equivalent to node age) of the host transfer
95% HPD low	The lower bound of the 95% highest posterior density (analogous to a 95% CI) for the node height of the host transfer
95% HPD high	The upper bound of the 95% highest posterior density (analogous to a 95% CI) for the node height of the host transfer
